# Supplementary material
Source: PubMed Central journal article supplement (PMC1637549)

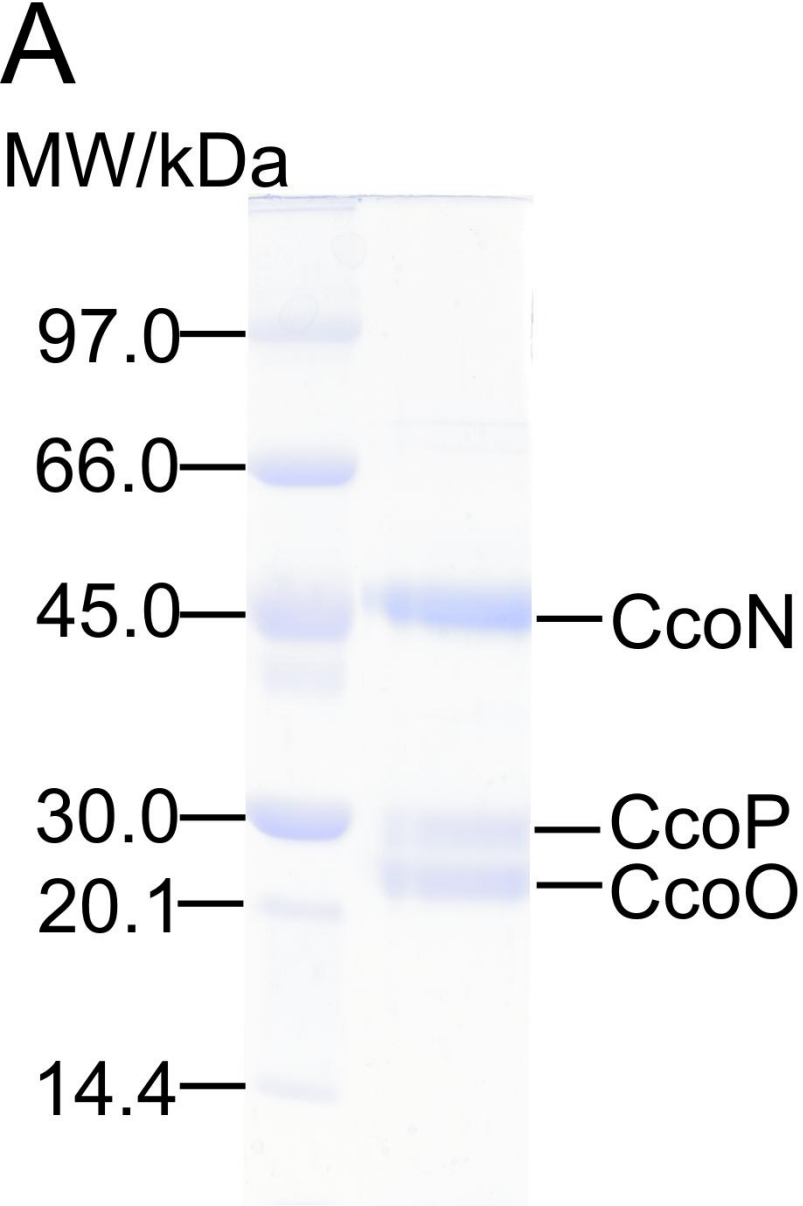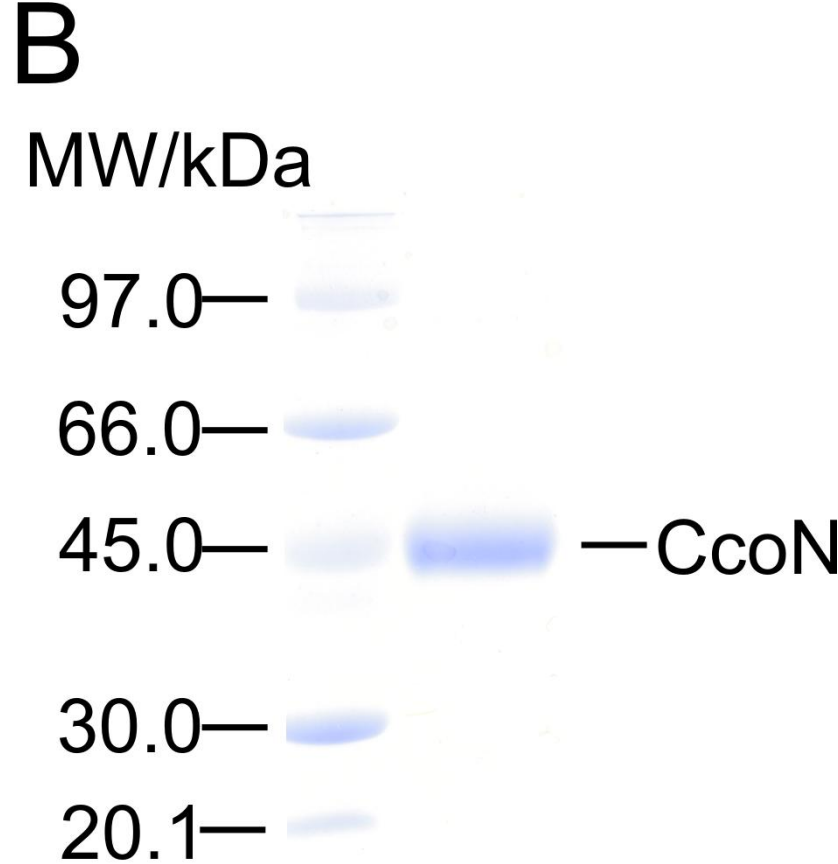

Supplement: pnas_0606254103_1.pdf [file pnas_0606254103_1.pdf]
